# Supplementary material for: Blood-Flow Restriction Resistance Exercise for Older Adults with Knee Osteoarthritis: A Pilot Randomized Clinical Trial
Source: MDPI journal article supplement (doi:10.3390/jcm8020265), 2019-02-21
Supplement: s1 [file s1]

## Supplementary Table

**Table S1.** Clinical chemistry and hematology safety outcomes

|                                 | <b>BFR</b>             | <b>MIRT</b>          | <b>Mean Difference</b> |
|---------------------------------|------------------------|----------------------|------------------------|
| Urea Nitrogen (BUN), mg/dL      | -2.02 (-3.92, -0.12)   | 0.21 (-1.79, 2.21)   | -2.23 (-5.02, 0.55)    |
| Sodium, mmol/L                  | -0.06 (-1.30, 1.17)    | -1.99 (-3.29, -0.69) | 1.93 (0.10, 3.75)      |
| Creatinine, mg/dL               | -0.02 (-0.08, 0.04)    | 0.05 (-0.01, 0.12)   | -0.08 (-0.16, 0.01)    |
| Potassium, mmol/L               | -0.18 (-0.37, 0.02)    | 0.04 (-0.17, 0.25)   | -0.21 (-0.50, 0.08)    |
| Chloride, mmol/L                | -0.33 (-1.48, 0.82)    | -1.24 (-2.43, -0.06) | 0.91 (-0.78, 2.60)     |
| Carbon Dioxide, mmol/L          | 0.06 (-1.68, 1.80)     | -0.08 (-1.93, 1.77)  | 0.14 (-2.43, 2.71)     |
| Calcium, mg/dL                  | -0.09 (-0.25, 0.06)    | -0.07 (-0.23, 0.09)  | -0.02 (-0.26, 0.21)    |
| Total Protein, g/dL             | -0.14 (-0.34, 0.06)    | -0.08 (-0.30, 0.13)  | -0.06 (-0.36, 0.25)    |
| Albumin, g/ml                   | 0.04 (-0.09, 0.17)     | 0.00 (-0.13, 0.14)   | 0.04 (-0.15, 0.23)     |
| Globulin, g/dL                  | -0.15 (-0.28, -0.02)   | -0.13 (-0.27, 0.01)  | -0.02 (-0.22, 0.18)    |
| Total Bilirubin, mg/dL          | 0.04 (-0.08, 0.15)     | -0.03 (-0.15, 0.09)  | 0.06 (-0.10, 0.23)     |
| Alkaline Phosphate, U/L         | -0.33 (-6.63, 5.67)    | 1.80 (-5.14, 8.74)   | -2.13 (-11.75, 7.49)   |
| Red Blood Cell Count, cell/L    | -0.07 (-0.18, 0.04)    | 0.00 (-0.11, 0.11)   | -0.07 (-0.23, 0.09)    |
| White Blood Cell Count, cells/L | -0.42 (-0.85, 0.02)    | 0.37 (-0.10, 0.85)   | -0.79 (-2.44, -0.13)   |
| Hematocrit, L/L                 | 0.29 (-1.78, 2.37)     | -2.70 (-4.82, -0.58) | 3.00 (-0.06, 6.05)     |
| Platelet Count, cells/L         | -17.02 (-33.37, -0.66) | 3.56 (-13.66, 20.79) | -20.58 (-44.61, 3.44)  |

Clinical chemistry and hematology safety outcomes were evaluated from baseline to week 12. Values are reported as the estimate mean difference and 95% CI. Abbreviations: BFR—blood-flow restriction, MIRT—moderate-intensity resistance training.
